# Supplementary material
Source: publisher site journal article supplement (https://cdn.jamanetwork.com/ama/content_public/journal/intemed/938894/ioi220006supp4_prod_1649946556.50631.pdf)
Supplement: Supplementary file 1 [file ioi220006supp4_prod_1649946556.50631.pdf]

## Data Sharing Statement

Lim. Efficacy of Ivermectin Treatment on Disease Progression Among Adults With Mild to Moderate COVID-19 and Comorbidities. *JAMA Intern Med.* Published February 18, 2022. doi:10.1001/jamainternmed.2022.0189

### Data

**Data available:** Yes

**Data types:** Data dictionary

**How to access data:** send data request and research proposal to Dr Steven Lim ([stevenlimcl@gmail.com](mailto:stevenlimcl@gmail.com))

**When available:** With publication

### Supporting Documents

**Document types:** None

### Additional Information

**Who can access the data:** certified researchers affiliated with health, academic or research institution, whose proposed use of the data has been reviewed and approved by principal investigator of the I-TECH Study

**Types of analyses:** for a specified purpose

**Mechanisms of data availability:** after approval of a proposal
